# Supplementary material for: A novel route to product specificity in the Suv4-20 family of histone H4K20 methyltransferases
Source: PubMed Central journal article supplement (PMC3874154; doi:10.1093/nar/gkt776), 2013-09-18

# **A novel route to product specificity in the Suv4-20 family of histone H4K20 methyltransferases**

Stacey M. Southall, Nora B. Cronin and Jon R. Wilson

## **Supplementary Data**

**S1. Analysis of the basis of Suv-20 activity.**

**S2. Sequence comparison of human SET proteins.**

**S3. Peptide binding using Microscale Thermophoresis**

**S4. Analysis of cofactor binding in Suv4-20h1 and Suv4-20h2.**

**S5. Origins of Suv4-20h1 and Suv4-20h2.**

**S6. Analysis of the SMYD3 active site.**

## S1. Analysis of the basis of Suv4-20 activity.

### S1A. Comparison of target lysine binding in the active sites of PR-Set7 and Suv4-20H2.

The panels on the left show views of the PR-Set7 active site from the side and from the top (from PDB: 2BQZ). The panels on the right show the equivalent views of the Suv4-20h2 active site. In place of the hydrogen bond interaction observed in PR-Set7 between the lysine  $N\epsilon$  and the Tyr245 hydroxyl in Suv4-20h2 there is a hydrogen bond with the Ser161 hydroxyl. In PR-Set7 the second position on the lysine  $N\epsilon$  is involved to a hydrogen bond to a water molecule which in turn makes a strong hydrogen bond to Tyr334. In Suv4-20 their are no conventional hydrogen bonds at this position, but the substrate methyl is presented to a large hydrophobic pocket, at the centre of which is the sidechain of Phe191. The distance between the substrate methyl and the  $C\zeta$  atom on Phe191 is only 3.3Å and therefore this likely represents a CH- $\pi$  hydrogen bond; the methyl - Phe interaction positions the lysine for optimal methyl transfer.

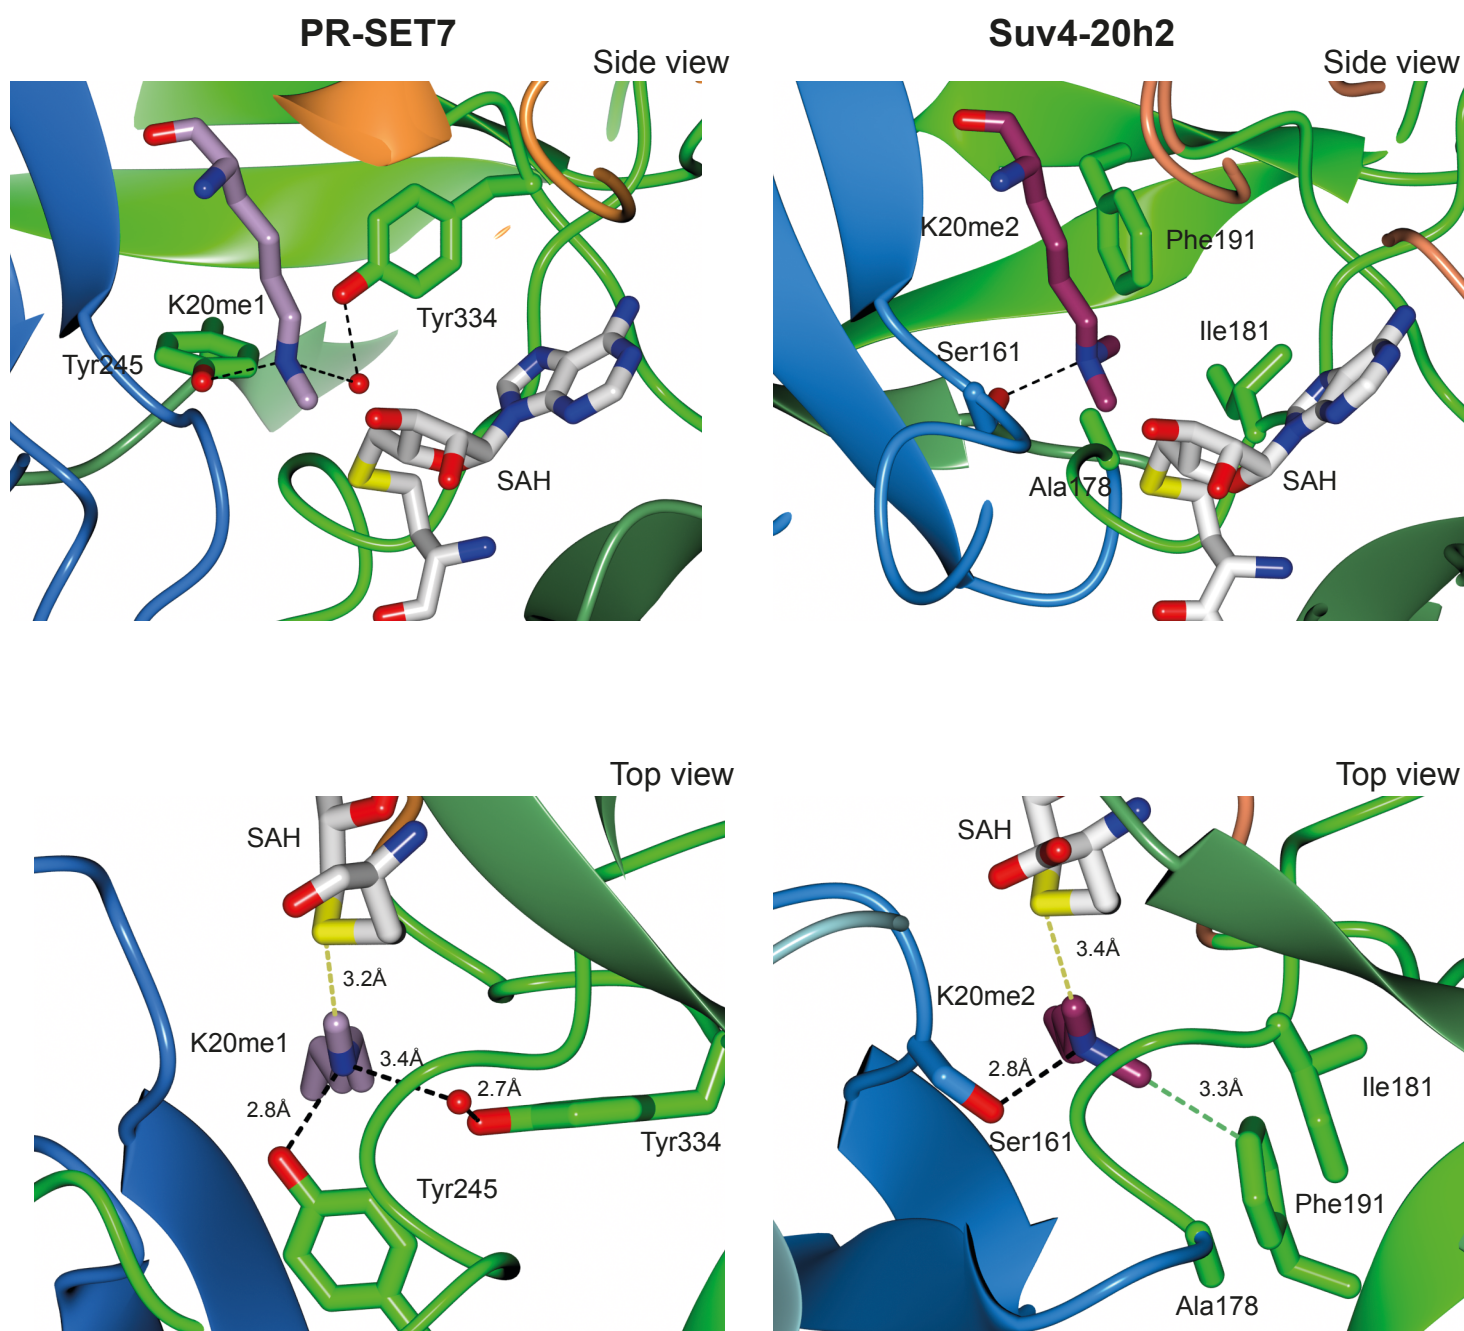

### S1B. Activity of a Suv4-20h1(F237Y) mutant

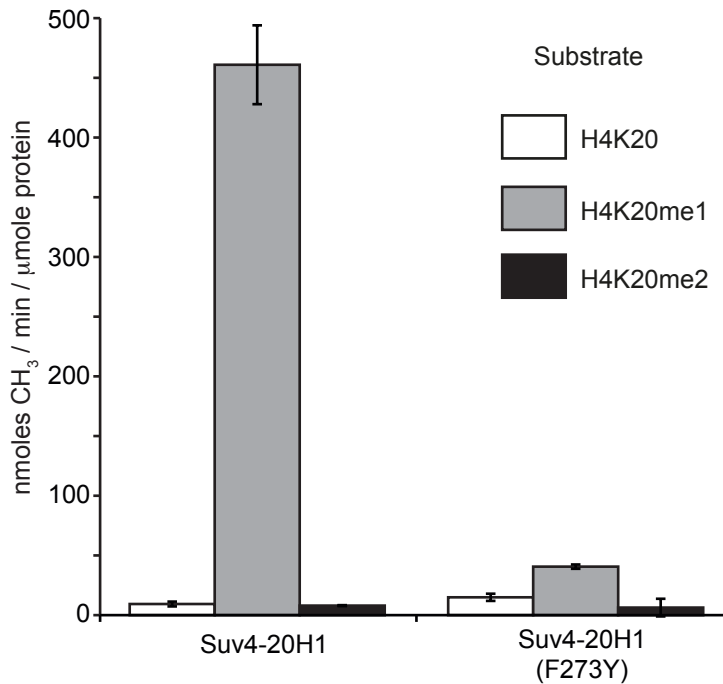

Specificity profile of a Suv4-20h1(F237Y) mutant in a methyltransferase assay with unmodified, H4K20me1 or H4K20me2 substrate. The activity of the mutant enzyme is severely reduced compared to the wild-type, presumably due to the limited space in the active site.

### S1C. Salt dependence of Suv4-20h2

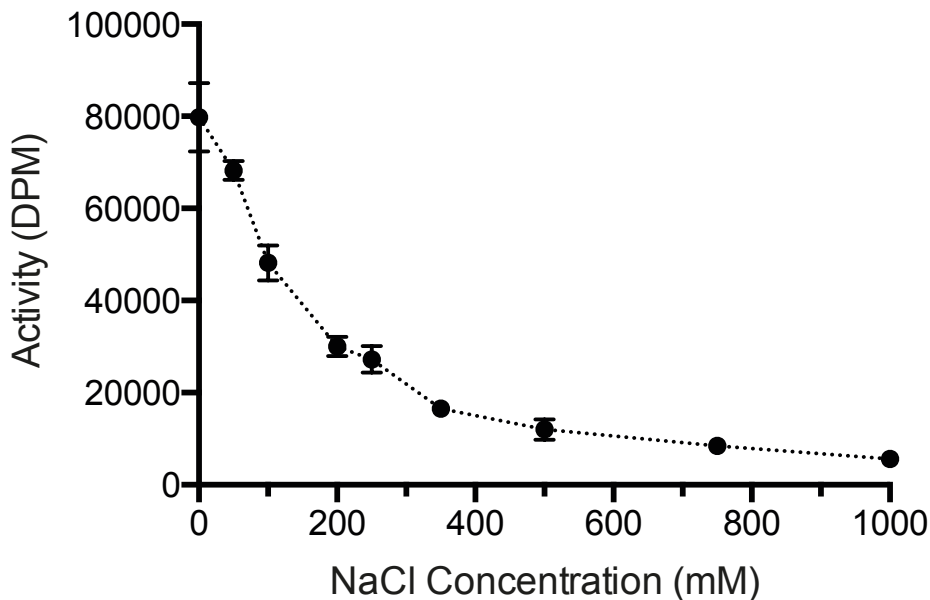

Methyltransferase activity of Suv4-20h2(1-246), with 500 μM H4K20me1 peptide, 500 μM SAM in reaction buffer containing 50 mM Tris, pH8.5, 1 mM DTT and increasing concentrations of NaCl. The enzyme shows a very clear dependence on the salt concentration of the reaction buffer.

## S2. Sequence comparison of human SET domain proteins

Multiple sequence alignment of the SET domain proteins in the human genome reveals that the occurrence of Phe or Tyr residues at the canonical positions in the SET-N region (A) or SET-C region (B) is less conserved than would be expected from analysis of the currently well-characterised subset of proteins. At the B position there is significant variance and this suggests that like the Suv4-20 family many SET domain family proteins may not control specificity through the Phe-Tyr switch but have evolved an alternative mechanism.

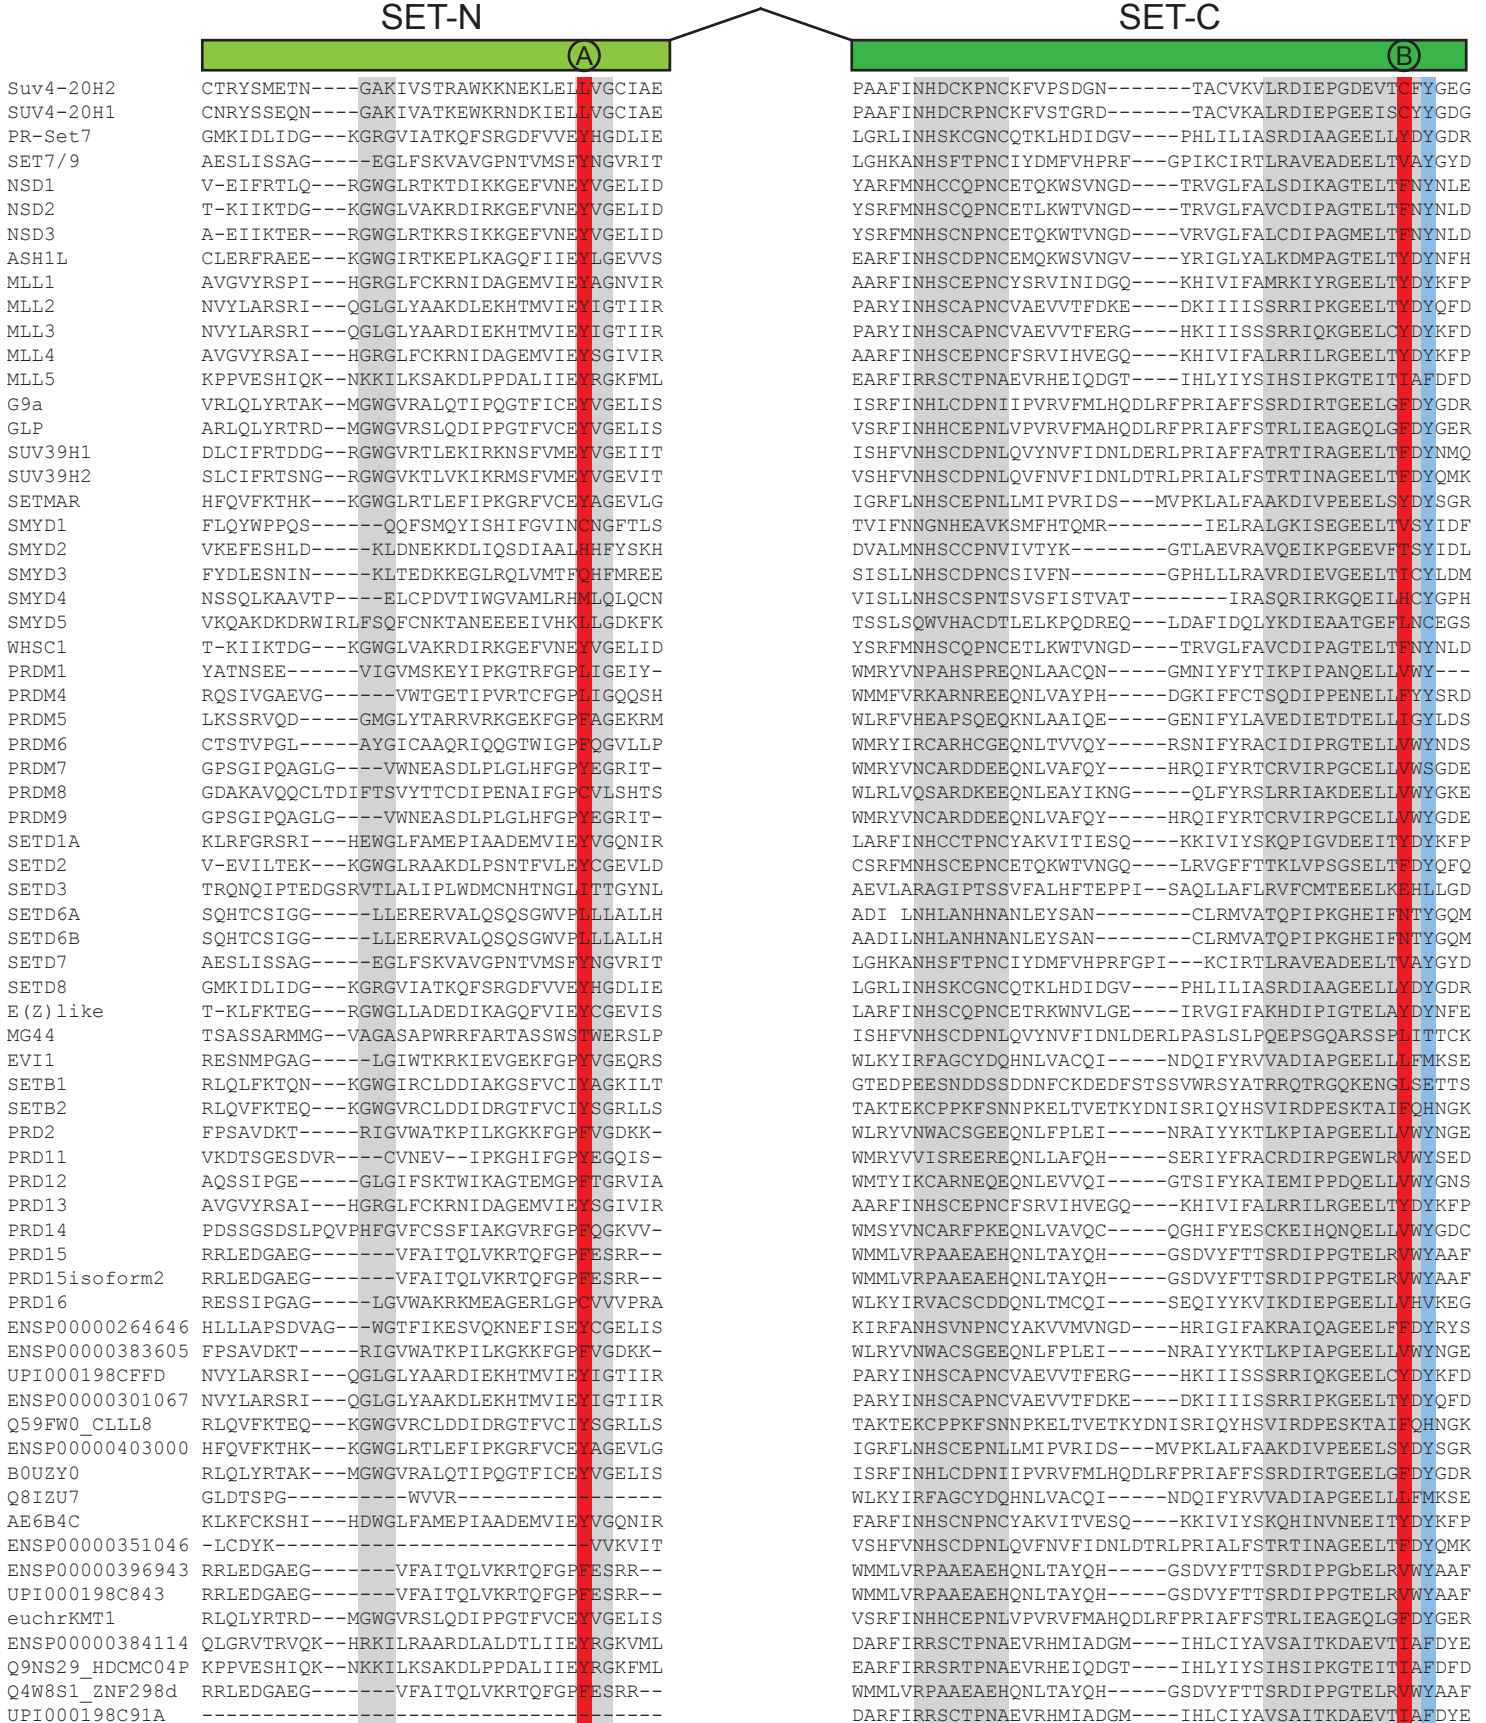

### S3. Measurement of binding affinity of Suv4-20 enzymes for histone H4K20me1 peptide using Microscale Thermophoresis.

Binding measurements by MST were performed using a NanoTemper Monolith NT.115 Instrument (NanoTemper Technologies GmbH). The peptide tested was a N-terminally fluorescein tagged KRHRK(me1)VLRD (Pepceuticals). Measurements were made at 20 °C using 25% light-emitting diode power and 40% infrared-laser power with laser-on time was 30 s and laser-off time 5 s.

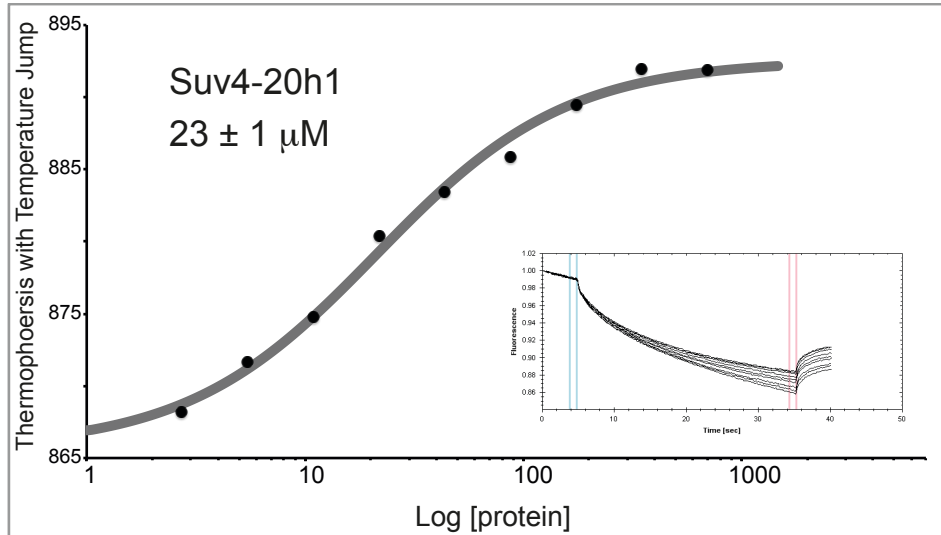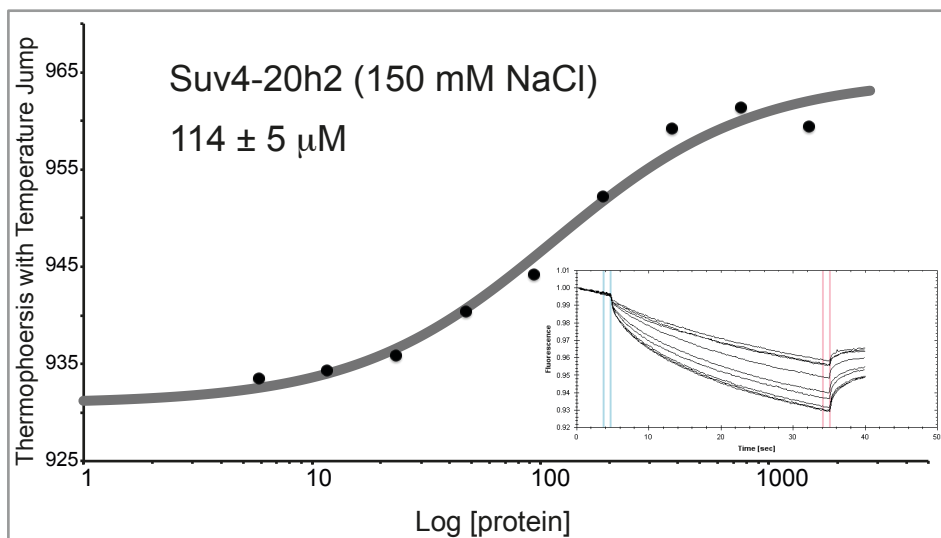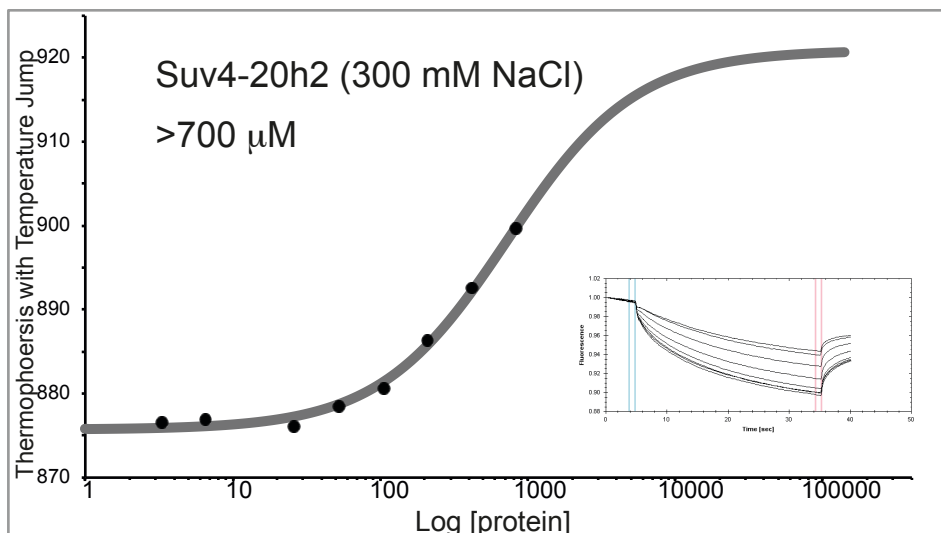

#### S4. Analysis of cofactor binding in Suv4-20h1 and Suv4-20h2

**S4A.** Stereo view of the overview of the superposition of Suv4-20h2 (coloured as per Figure 1C) and Suv4-20h1 (gray) as shown in Figure 4A.

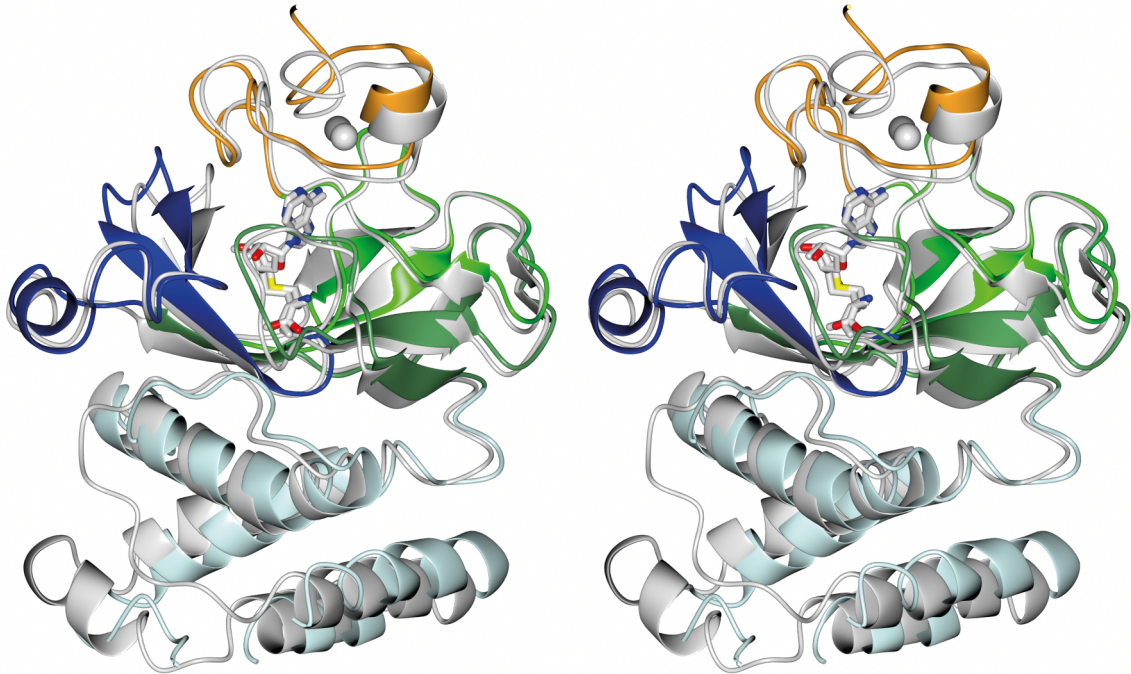

**S4B.** Stereo view of the overlay of the cofactor binding residues of Suv4-20h1- SAM complex (orange) and the Suv4-20h2 (blue), as shown in Figure 4B.

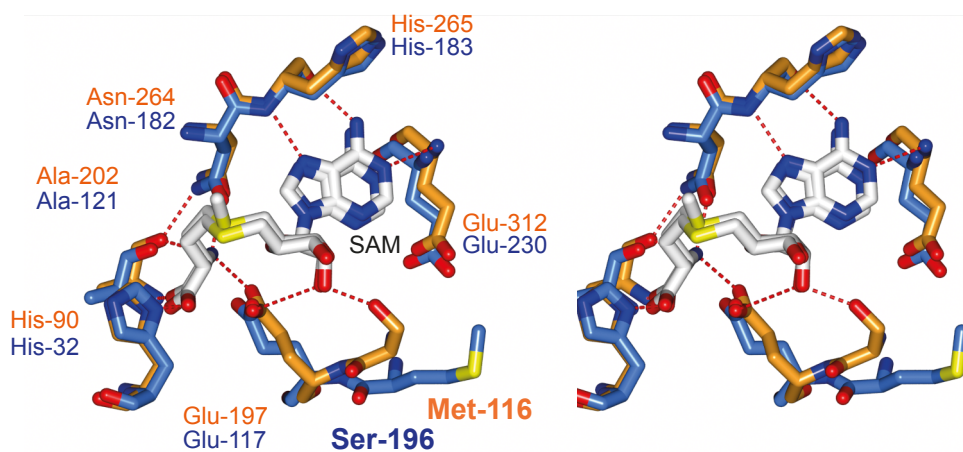

### S4C. Isothermal calorimetry of SAM binding to Suv4-20 enzymes.

The Suv4-20h1 enzyme binds SAM with a moderately higher affinity than Suv4-20h2 (A. 11.2  $\mu\text{M}$  compared to B. 17.2  $\mu\text{M}$ ). Comparing the structures of the enzymes Suv4-20h1 makes an extra interaction with SAM via Ser205 which in Suv4-20h2 is Met116. Mutation of this methionine to serine in Suv4-20h2 increases the affinity to C. 12.5  $\mu\text{M}$ .

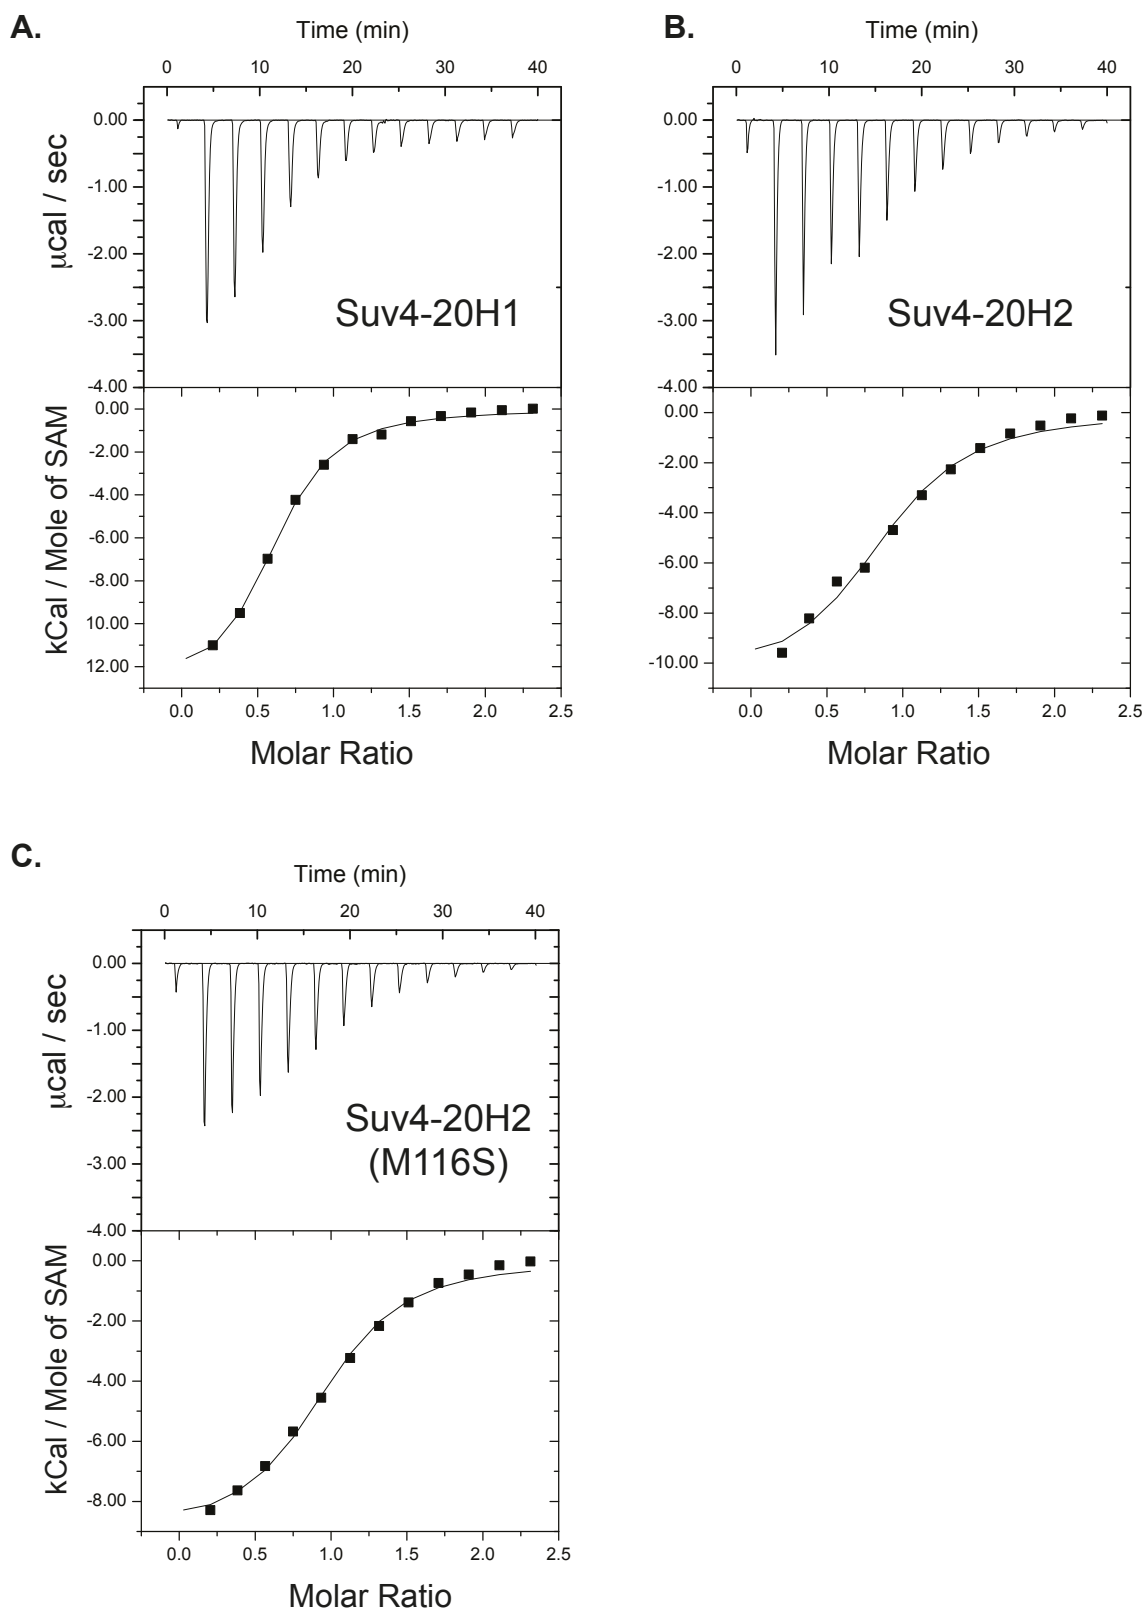

## S5. Analysis of the SMYD3 active site

**S5A.** and **S5B.** Cartoon representations of the active site of the SMYD3 active site from the binary complex with SAH (PDB: 3OXL, Xu *et al.* (2011) *Nucleic Acids Research* 39, pp. 4438-4449), with equivalent colouring to that used elsewhere in the manuscript for the Suv4-20 SET domain. The gray sticks are included for reference and represent the side chain of the Ser161 and the H4K20 di-methyl lysine from the Suv4-20h2 ternary complex structure, the position results from the superpositioning on the respective SAH molecules. The SMYD3 active site contains a hydrophobic pocket formed from Ile201, Ile214 and Ile237 that may accommodate a methyl group in an analogous fashion to Suv4-20h2. The arrangement of residues around the Ser161 equivalent position is somewhat more “open” and hydrophobic in character and we speculate that this may be able to accommodate a third methyl group (Shown schematically in C.). Further structural and biochemical analysis of SMYD3 will be required to confirm this hypothesis.

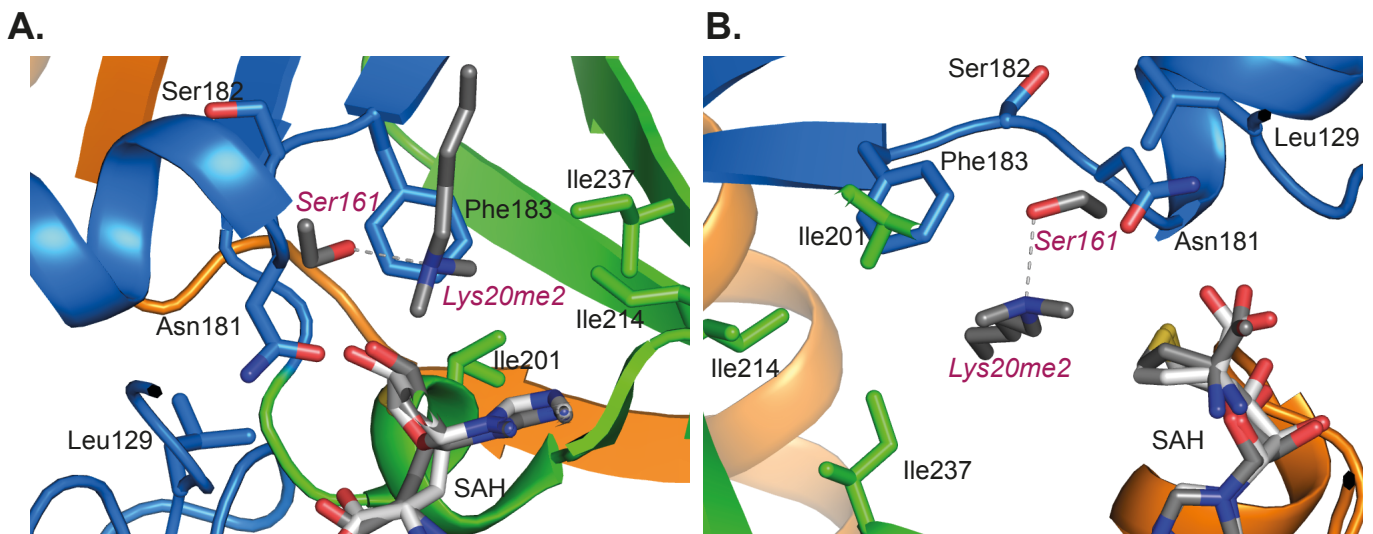

**C.** Schematic representation of how tri-methylation may occur in SMYD3

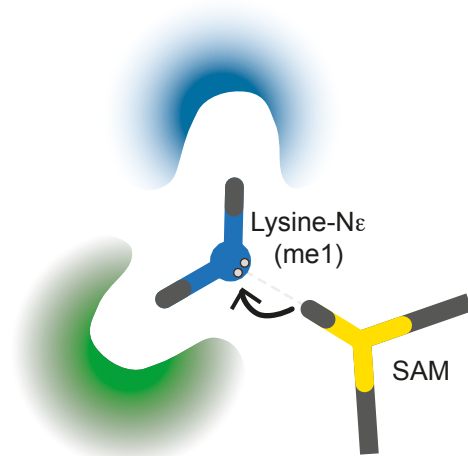



## S6. Origins of Suv4-20h1 and Suv4-20h2

The comparison of the SET domain region of the Suv4-20 family of H4K20 methyltransferases across a range of species suggests that the Suv4-20h1 and Suv4-20h2 paralogs may have evolved from a common ancestor. (A) The unrooted tree from phylogenetic analysis of the SET domains from representative species creates an evolutionary context for the relationship between Suv4-20h1 and Suv4-20h2. The enzymes do not segregate together suggesting that they have evolved in parallel. (B) Methyltransferase activity of the Suv4-20 enzyme from *Drosophila melanogaster* with respect to H4 peptide shows similar kinetics to mouse Suv4-20h1. The Michaelis-Menten parameters were;  $K_M=90 \pm 10 \mu\text{M}$  and  $V_{\text{max}}=8001 \pm 0.2 \text{ nmol CH}_3/\text{min}/\mu\text{mol}$ .

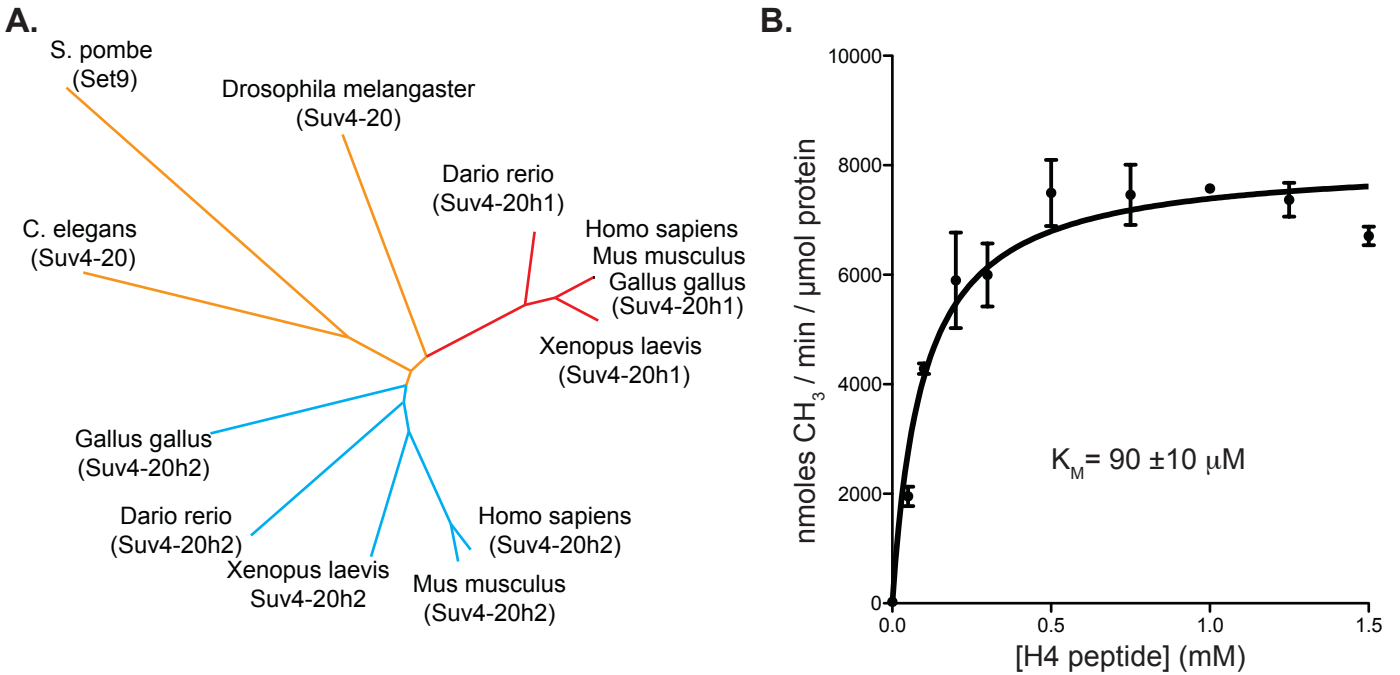

Supplement: supp_gkt776_nar-01772-m-2013-File006.pdf [file supp_gkt776_nar-01772-m-2013-File006.pdf]
